# Supplementary material for: EXO70D isoforms mediate selective autophagic degradation of Type-A ARR proteins to regulate cytokinin sensitivity
Source: bioRxiv or medRxiv preprint supplement (doi:10.1101/2020.02.07.938712), 2020-02-07
Supplement: Supplementary file [file media-2.pdf]

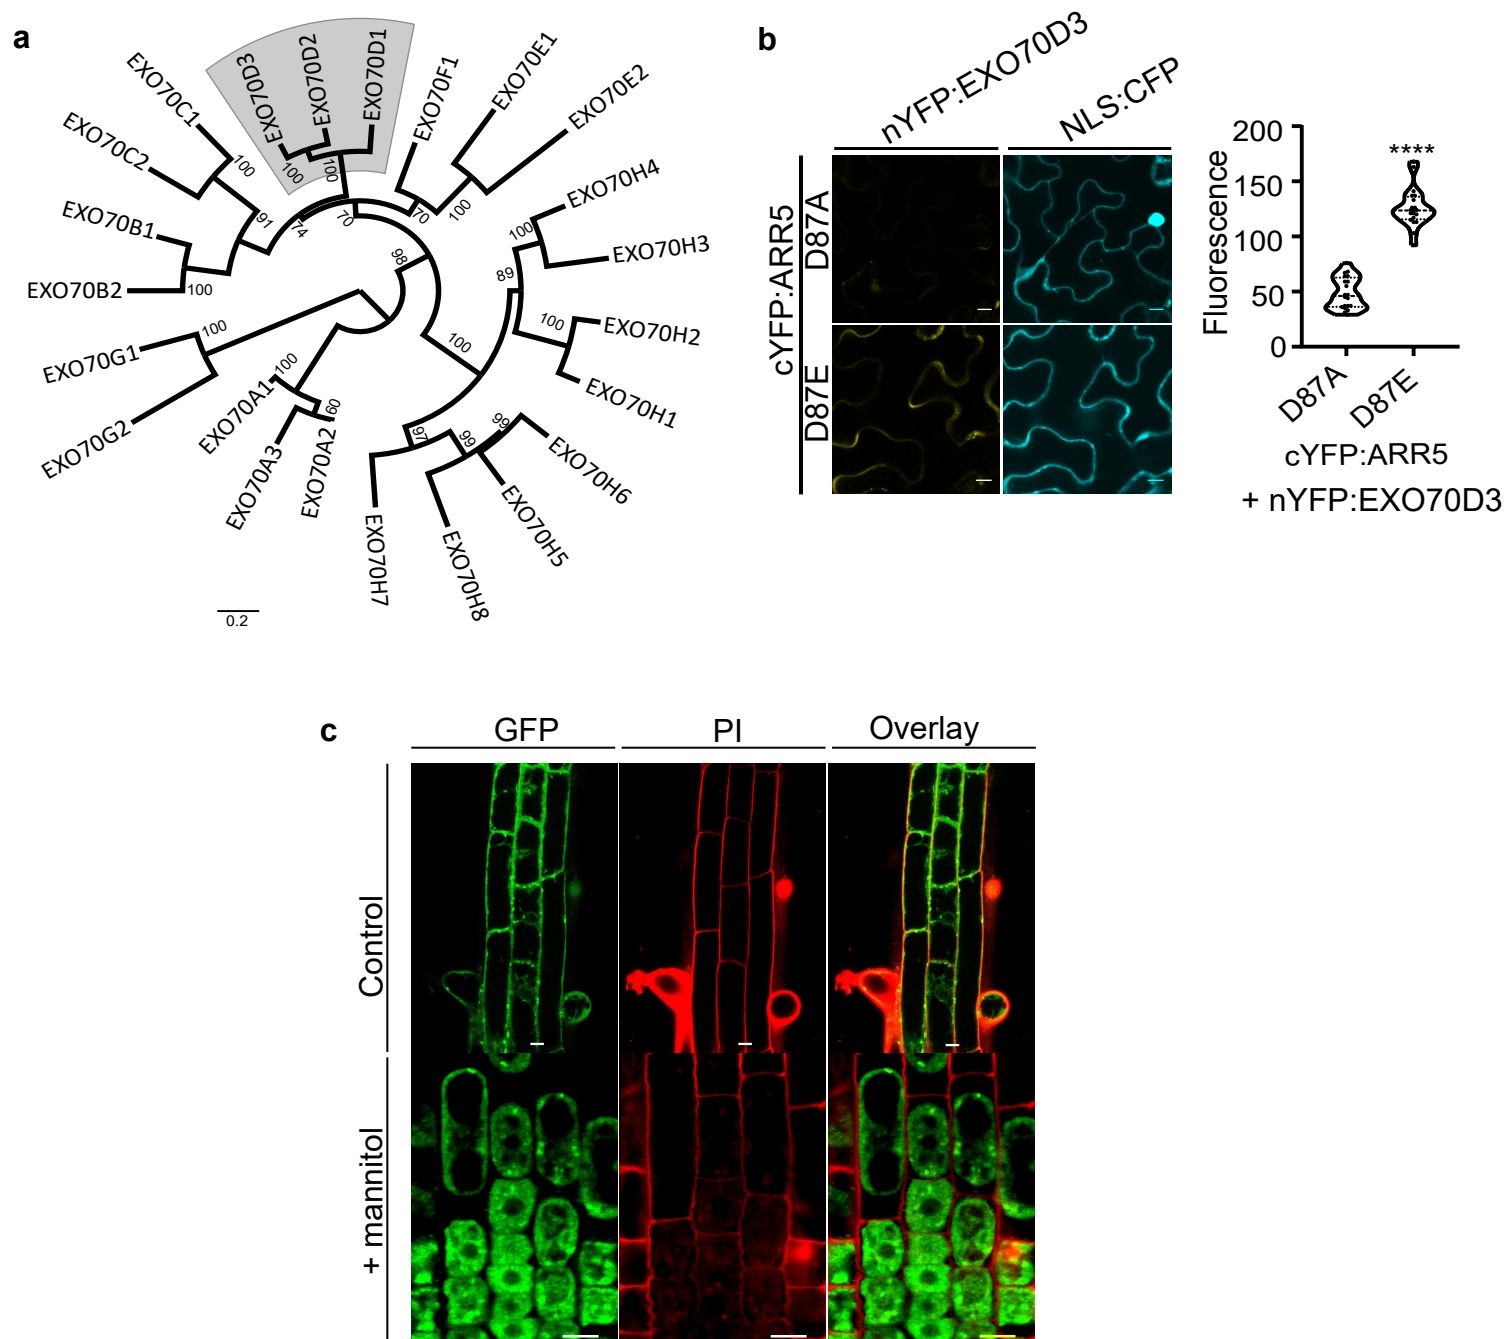

**Supplementary Fig. 2:** EXO70D3, a member of the EXO70 gene family, interacts with type-A ARR5 in a phospho-Asp dependent manner
